# Supplementary material for: CellTool: An Open-Source Software Combining Bio-Image Analysis and Mathematical Modeling for the Study of DNA Repair Dynamics
Source: Int J Mol Sci. 2023 Nov 26;24(23):16784. doi: 10.3390/ijms242316784 (PMC10706408; doi:10.3390/ijms242316784)
Supplement: Supplementary file 1 [file ijms-24-16784-s001.zip › Supplementary_S2.txt]

Tau_S2 fit
{A*(1-Exp[-k*t])}+{B*(1-Exp[-k*t])}
t>=d
{A*((k/(k-l))*Exp[l*(d-t)]-(l/(k-l))*Exp[k*(d-t)]-Exp[-k*t])}+{B*(1-Exp[-k*t])}
A;k;l;d;B;

Tau_S3 fit
{A*(1-(l/(l-k))*Exp[-k*t]-(k/(k-l))*Exp[-l*t])}+{B*(1-l*Exp[-k*t]/(l-k)-k*Exp[-l*t]/(k-l))}
t>=d
{A*(-(l/(l-k))*Exp[-k*t]-(k/(k-l))*Exp[-l*t]+(l*m/((l-k)*(m-k)))*Exp[k*(d-t)]+(k*m/((k-l)*(m-l)))*Exp[l*(d-t)]+(k*l/((k-m)*(l-m)))*Exp[m*(d-t)])}+{B*(1-l*Exp[-k*t]/(l-k)-k*Exp[-l*t]/(k-l))}
A;l;k;B;m;d;

Tau_S4 fit
{A*(1-(l*m/((l-k)*(m-k)))*Exp[-k*t]-(k*m/((k-l)*(m-l)))*Exp[-l*t]-(k*l/((k-m)*(l-m)))*Exp[-m*t])}+{B*(1-l*m*Exp[-k*t]/((l-k)*(m-k))-k*m*Exp[-l*t]/((k-l)*(m-l))-k*l*Exp[-m*t]/((k-m)*(l-m)))}
t>=d
{A*(-(l*m/((l-k)*(m-k)))*Exp[-k*t]-(k*m/((k-l)*(m-l)))*Exp[-l*t]-(k*l/((k-m)*(l-m)))*Exp[-m*t]+l*m*n*Exp[k*(d-t)]/((l-k)*(m-k)*(n-k))+k*m*n*Exp[l*(d-t)]/((k-l)*(m-l)*(n-l))+k*l*n*Exp[m*(d-t)]/((k-m)*(l-m)*(n-m))+k*l*m*Exp[n*(d-t)]/((k-n)*(l-n)*(m-n)))}+{B*(1-l*m*Exp[-k*t]/((l-k)*(m-k))-k*m*Exp[-l*t]/((k-l)*(m-l))-k*l*Exp[-m*t]/((k-m)*(l-m)))}
A;l;m;k;B;d;n;

S2_0 fit
A*(1-Exp[-k*t])
t>=0
A*(1-Exp[-k*t])
A;k;

S3_0 fit
A*(1-l*Exp[-k*t]/(l-k)-k*Exp[-l*t]/(k-l))
t>=0
A*(1-l*Exp[-k*t]/(l-k)-k*Exp[-l*t]/(k-l))
A;k;l;

S4_0 fit
A*(1-l*m*Exp[-k*t]/((l-k)*(m-k))-k*m*Exp[-l*t]/((k-l)*(m-l))-k*l*Exp[-m*t]/((k-m)*(l-m)))
t>=0
A*(1-l*m*Exp[-k*t]/((l-k)*(m-k))-k*m*Exp[-l*t]/((k-l)*(m-l))-k*l*Exp[-m*t]/((k-m)*(l-m)))
A;k;l;m;

S5_0 fit
A*(1-l*m*n*Exp[-k*t]/((l-k)*(m-k)*(n-k))-k*m*n*Exp[-l*t]/((k-l)*(m-l)*(n-l))-k*l*n*Exp[-m*t]/((k-m)*(l-m)*(n-m))-k*l*m*Exp[-n*t]/((k-n)*(l-n)*(m-n)))
t>=0
A*(1-l*m*n*Exp[-k*t]/((l-k)*(m-k)*(n-k))-k*m*n*Exp[-l*t]/((k-l)*(m-l)*(n-l))-k*l*n*Exp[-m*t]/((k-m)*(l-m)*(n-m))-k*l*m*Exp[-n*t]/((k-n)*(l-n)*(m-n)))
A;k;l;m;n;

S6_0 fit
A*(1-l*m*n*p*Exp[-k*t]/((l-k)*(m-k)*(n-k)*(p-k))-k*m*n*p*Exp[-l*t]/((k-l)*(m-l)*(n-l)*(p-l))-k*l*n*p*Exp[-m*t]/((k-m)*(l-m)*(n-m)*(p-m))-k*l*m*p*Exp[-n*t]/((k-n)*(l-n)*(m-n)*(p-n))-k*l*m*n*Exp[-p*t]/((k-p)*(l-p)*(m-p)*(n-p)))
t>=0
A*(1-l*m*n*p*Exp[-k*t]/((l-k)*(m-k)*(n-k)*(p-k))-k*m*n*p*Exp[-l*t]/((k-l)*(m-l)*(n-l)*(p-l))-k*l*n*p*Exp[-m*t]/((k-m)*(l-m)*(n-m)*(p-m))-k*l*m*p*Exp[-n*t]/((k-n)*(l-n)*(m-n)*(p-n))-k*l*m*n*Exp[-p*t]/((k-p)*(l-p)*(m-p)*(n-p)))
A;k;l;m;n;p;
